# Supplementary material for: Formation of sub-valent carbenoid ligands by metal-mediated dehydrogenation chemistry: coordination and activation of H2Ga{(NDippCMe)2CH}
Source: Royal Society of Chemistry journal article supplement (doi:10.1039/c3sc52133h), 2013-01-01
Supplement: c3sc52133h.pdf [file c3sc52133h.pdf]

# Formation of sub-valent carbenoid ligands by metal-mediated dehydrogenation chemistry: coordination and activation of $\text{H}_2\text{Ga}\{\text{NDippCMe}\}_2\text{CH}\}$

*Joshua Turner, Joseph A.B. Abdalla, Joshua I. Bates, Remi Tirfoin, Michael J. Kelly, Nicholas Phillips and Simon Aldridge\**

## Supporting Information (23 pages)

|                                           |     |
|-------------------------------------------|-----|
| 1. General methods and starting materials | S2  |
| 2. Syntheses of new compounds             | S3  |
| 3. Details of DFT calculations            | S6  |
| 4. References for supporting information  | S23 |

## 1. General methods and starting materials

All manipulations were carried out using standard Schlenk line or dry-box techniques under an atmosphere of argon. Solvents were degassed by sparging with argon and dried by passing through a column of the appropriate drying agent using a commercially available Braun SPS. Fluorobenzene and 1,2-difluorobenzene were dried by refluxing over calcium hydride, distilled, sparged and stored over activated molecular sieves. NMR spectra were recorded in benzene- $d_6$ , dichloromethane- $d_2$  or bromobenzene- $d_5$ , which were dried over potassium, molecular sieves or calcium hydride respectively, and stored under argon in Teflon valve ampoules. NMR samples were prepared under argon in 5 mm Wilmad 507-PP tubes fitted with J. Young Teflon valves.  $^1\text{H}$  and  $^{13}\text{C}$  NMR spectra were recorded on Varian Mercury-VX-300 or Bruker AVII-500 spectrometers and referenced internally to residual protio-solvent ( $^1\text{H}$ ) or solvent ( $^{13}\text{C}$ ) resonances and are reported relative to tetramethylsilane ( $\delta = 0$  ppm). Chemical shifts are quoted in  $\delta$  (ppm) and coupling constants in Hz. Infrared spectra were measured on a Nicolet 500 FT-IR spectrometer. Elemental analyses were carried out by Stephen Boyer at London Metropolitan University. Starting materials  $\text{Mo}(\text{CO})_4(\text{COD})$ <sup>S1</sup> and  $\text{W}(\text{CO})_4(\text{COD})$ <sup>S1</sup> were prepared by literature procedures.  $\text{H}_2\text{Ga}\{\text{NDippCMe}_2\text{CH}\}$  (**1**) was prepared by a method directly analogous to that reported in the literature,<sup>S2</sup> but employing  $\text{Cl}_2\text{Ga}\{\text{NDippCMe}_2\text{CH}\}$  as a starting material rather than  $\text{I}_2\text{Ga}\{\text{NDippCMe}_2\text{CH}\}$ . Photolysis experiments were carried out using a Spectral Energy mercury arc lamp (1 kW) with samples contained either within a quartz Schlenk vessel or a J. Young's NMR tube.

## 2. Syntheses of new compounds

**2a:** Cp\*Mn(CO)<sub>3</sub> (0.1 mL, 0.6 mmol) was added to a quartz Schlenk tube containing a stirred solution of **1** (0.300 g, 0.613 mmol) in toluene (15 mL). The solution was then subjected to UV photolysis at room temperature for 2.5 h. The orange solution was then filtered, concentrated and cooled to -30 °C, yielding yellow crystals of **2** which were isolated by filtration and dried *in vacuo*. Isolated yield of single crystals: 0.13 g, 31% (*in situ* monitoring of the reaction by <sup>1</sup>H NMR in toluene-d<sub>8</sub> is consistent with *ca.* 90% conversion of **1** to **2a**; the lower isolated yield reflects – at least in part – the high solubility of **2a** in compatible hydrocarbon solvents and its high sensitivity to air/moisture, resulting in relatively inefficient recrystallization). <sup>1</sup>H NMR (300 MHz, benzene-d<sub>6</sub>, 298 K): δ<sub>H</sub> -13.46 (d, <sup>2</sup>J<sub>HH</sub> = 19.2 Hz, 2H, MnHGa), 1.15 (d, <sup>3</sup>J<sub>HH</sub> = 7.2 Hz, 12H, CH<sub>3</sub> of Dipp<sup>i</sup>Pr), 1.45 (d, <sup>3</sup>J<sub>HH</sub> = 7.2 Hz, 6H, CH<sub>3</sub> of Dipp<sup>i</sup>Pr), 1.53 (d, <sup>3</sup>J<sub>HH</sub> = 7.2 Hz, 6H, CH<sub>3</sub> of Dipp<sup>i</sup>Pr), 1.55 (s, 3H, CH<sub>3</sub> of Cp<sup>i</sup>), 1.56 (s, 6H, CH<sub>3</sub> of β-diketiminato backbone), 3.33 (sept, <sup>3</sup>J<sub>HH</sub> = 7.2 Hz, 2H, CH of Dipp<sup>i</sup>Pr), 3.46 (sept, <sup>3</sup>J<sub>HH</sub> = 7.2 Hz, 2H, CH of Dipp<sup>i</sup>Pr), 3.52 (m, 2H, Cp<sup>i</sup>), 3.62 (m, 2H, Cp<sup>i</sup>), 4.83 (s, 1H, γ-CH), 7.09–7.13 (overlapping m, 6H, ArH). The terminal GaH resonance is tentatively assigned to a broad signal centred at δ<sub>H</sub> ca. 6.9 ppm. <sup>13</sup>C NMR (126 MHz, benzene-d<sub>6</sub>, 298 K): δ<sub>C</sub> 13.2 (CH<sub>3</sub> of Cp<sup>i</sup>), 23.9 (CH<sub>3</sub> of β-diketiminato backbone), 24.2, 24.6, 24.7, 25.7 (CH<sub>3</sub> of Dipp<sup>i</sup>Pr), 28.2, 29.4 (CH of Dipp<sup>i</sup>Pr), 80.2, 80.5 (CH of Cp<sup>i</sup>), 94.4 (quaternary-C of Cp<sup>i</sup>), 95.7 (γ-CH), 124.2, 125.1, 127.2, 142.7, 142.9, 145.0 (ArC), 168.8 (CN), 230.4 (CO). IR (hexanes, ν<sub>CO</sub>/cm<sup>-1</sup>): 1886 (s), 1951 (s). EI-MS: m/z 487.2 ([M-Cp<sup>i</sup>Mn(CO)<sub>2</sub>H]<sup>+</sup>, 100%), 676.2 ([M-2H]<sup>+</sup>, 1%). Reproducible elemental microanalysis for **2a** proved impossible to obtain due to its very high air/moisture sensitivity. Crystallographic data: C<sub>37</sub>H<sub>50</sub>N<sub>2</sub>O<sub>2</sub>GaMn, M<sub>r</sub> = 679.41, monoclinic, P2<sub>1</sub>/n, a = 10.1814(2), b = 20.4882(4), c = 16.7346(3) Å, β = 103.1581(11)°, V = 3399.16(11) Å<sup>3</sup>, Z = 4, ρ<sub>c</sub> = 1.328 Mg m<sup>-3</sup>, T = 150(2) K, λ = 0.71073 Å, 7688 independent reflections [R(int) = 0.059], used in all calculations. R<sub>1</sub> = 0.0732, wR<sub>2</sub> = 0.1459 for I > 2σ(I), and R<sub>1</sub> = 0.1473, wR<sub>2</sub> = 0.2096 for all unique reflections. Max./min. residual electron densities 1.74 and -2.07 e Å<sup>-3</sup>. CSD ref.: 944059.

**2b:** A solution of **2a** (0.240 g, 0.354 mmol) in toluene (20 mL) and subjected to UV photolysis for 2.5 h. The reaction mixture was filtered and the filtrate concentrated to the point of incipient crystallisation. Storage at -30 °C produced bright yellow crystals. Isolated yield of single crystals: 0.130 g, 54%. <sup>1</sup>H NMR (300 MHz, benzene-d<sub>6</sub>, 298 K): δ<sub>H</sub> 1.06 (d, <sup>3</sup>J<sub>HH</sub> = 6.9 Hz, 12H, CH<sub>3</sub> of Dipp<sup>i</sup>Pr), 1.43 (d, <sup>3</sup>J<sub>HH</sub> = 6.9 Hz, 12H, CH<sub>3</sub> of Dipp<sup>i</sup>Pr), 1.59 (s, 6H, CH<sub>3</sub> of β-diketiminato backbone), 1.73 (s, 3H, CH<sub>3</sub> of Cp<sup>i</sup>), 3.15 (sept, <sup>3</sup>J<sub>HH</sub> = 6.9 Hz, 4H, CH of Dipp<sup>i</sup>Pr), 3.52 (m, 2H, Cp<sup>i</sup>), 3.83 (m, 2H, Cp<sup>i</sup>), 5.10 (s, 1H, γ-CH), 7.12–7.22 (m, 6H, aromatic CH of Dipp<sup>i</sup>Pr). <sup>13</sup>C NMR (126 MHz, benzene-d<sub>6</sub>, 298 K): δ<sub>C</sub> 14.3 (CH<sub>3</sub> of Cp<sup>i</sup>), 24.6, 24.6, 24.8 (CH<sub>3</sub> of Dipp<sup>i</sup>Pr and β-diketiminato backbone), 29.5 (CH of Dipp<sup>i</sup>Pr), 76.6, 78.3 (CH of Cp<sup>i</sup>), 97.2 (quaternary-C of Cp<sup>i</sup>), 100.3 (γ-C), 125.0, 125.0, 128.7, 142.5, 143.7 (ArC of Dipp<sup>i</sup>Pr), 167.8 (NC), 233.6 (CO). IR (KBr disc, ν<sub>CO</sub>/cm<sup>-1</sup>): 1837 (s), 1903 (s). EI-MS: m/z 676.2 ([M]<sup>+</sup>, 13%), 620.2 ([M-2CO]<sup>+</sup>, 99%), 472 ([M-Cp<sup>i</sup>Mn(CO)<sub>2</sub>-Me]<sup>+</sup>, 100%). Elemental microanalysis: calcd. for C<sub>37</sub>H<sub>48</sub>N<sub>2</sub>O<sub>2</sub>GaMn: C 65.60% H 7.14% N 4.14%, meas. C 65.30% H 7.16% N 3.97%. Crystallographic data: C<sub>37</sub>H<sub>48</sub>N<sub>2</sub>O<sub>2</sub>GaMn, M<sub>r</sub> = 677.45, triclinic, P-1, a = 8.8327(1), b = 18.3781(2), c = 20.6752(2) Å, α = 90.008(1), β = 90.007(1), γ = 85.742(1)°, V = 3346.9(1) Å<sup>3</sup>, Z = 4, ρ<sub>c</sub> = 1.344 Mg m<sup>-3</sup>, T = 150(2) K, λ = 0.71073 Å. 15175 independent reflections [R(int) = 0.023], used in all calculations. R<sub>1</sub> = 0.0355, wR<sub>2</sub> = 0.0749 for I > 2σ(I), and R<sub>1</sub> = 0.0560, wR<sub>2</sub> = 0.0919 for all unique reflections. Max./min. residual electron densities 0.59 and -0.74 e Å<sup>-3</sup>. CSD ref.: 952954.

**3:** Fe(CO)<sub>5</sub> (0.083 mL, 0.613 mmol) was added to a quartz schlenk containing a stirred solution of **1** (0.300 g, 0.613 mmol) in toluene (15 mL). The solution was subjected to UV photolysis, whilst stirring, for 50 min, after which time <sup>1</sup>H NMR spectroscopy indicated quantitative conversion to **3**. The orange solution was filtered and concentrated, and cooled to -30 °C overnight to yield very pale yellow crystals of **3**. The crystals were isolated by filtration and dried *in vacuo*. Isolated yield of single crystals: 0.205 g, 51%. <sup>1</sup>H and <sup>13</sup>C NMR data, together with a single crystal X-ray diffraction study confirmed that the compound is identical to that reported by Power and co-workers.<sup>53</sup>

**4 and 5:** The two compounds were prepared by a similar method, exemplified for **5**. To an ampoule containing **1** (0.300 g, 0.613 mmol) in hexanes (10 mL) was added at room temperature a solution of W(CO)<sub>4</sub>(COD) (0.143 g, 0.613 mmol) also in hexanes (10 mL) and the resulting pale yellow mixture warmed to 55 °C, whilst stirring. After 5 d the solvent was removed *in vacuo* and the resulting yellow solid was extracted into fluorobenzene. Layering the fluorobenzene solution with hexanes at -20 °C yielded yellow crystals, which were isolated by filtration and dried *in vacuo*. Isolated yield of single crystals: 0.020 g, 14%. <sup>1</sup>H NMR (500 MHz, dichloromethane-d<sub>2</sub>, 298 K): δ<sub>H</sub> 1.21 (d, 12H, <sup>3</sup>J<sub>HH</sub> = 6.5 Hz CH<sub>3</sub> of Dipp<sup>i</sup>Pr), 1.29 (d, 12H, <sup>3</sup>J<sub>HH</sub> = 6.5 Hz CH<sub>3</sub> of Dipp<sup>i</sup>Pr), 1.905 (s, 6H, CH<sub>3</sub> of β-diketiminato backbone), 2.95 (sept, 4H, <sup>3</sup>J<sub>HH</sub> = 6.5 Hz CH of Dipp<sup>i</sup>Pr), 5.62 (s, 1H, γ-CH), 7.11–7.33 (m, 6H, ArH). <sup>13</sup>C NMR (126 MHz, CD<sub>2</sub>Cl<sub>2</sub>, 298 K): δ<sub>C</sub> 23.9 (CH<sub>3</sub> of Dipp<sup>i</sup>Pr), 24.5 (CH<sub>3</sub> of Dipp<sup>i</sup>Pr), 24.8 (CH<sub>3</sub> of β-diketiminato backbone) 29.6 (γ-CH of Dipp<sup>i</sup>Pr), 101.8 (γ-C), 124.8 (Ar-C), 128.4 (Ar-C), 141.0 (Ar-C), 143.1 (Ar-C), 169.1 (CN), 197.9 (CO), 201.0 (CO). IR (CH<sub>2</sub>Cl<sub>2</sub>, ν<sub>CO</sub>/cm<sup>-1</sup>): 1926 (b), 1968 (s), 2058 (s). EI-MS: m/z 726.2 ([M-3CO]<sup>+</sup>, 100%), 810.2 [M]<sup>+</sup>, 10%). Crystallographic data: C<sub>34</sub>H<sub>41</sub>N<sub>2</sub>O<sub>5</sub>GaW, M<sub>r</sub> = 811.28, orthorhombic, Pbnm, a = 9.15777(10), b = 35.5896(6), c = 21.050(3) Å, V = 6878.57(17) Å<sup>3</sup>, Z = 8, ρ<sub>c</sub> = 1.567 Mg m<sup>-3</sup>, T = 150(2) K, λ = 0.71073 Å. 7351 independent reflections [R(int) = 0.039], used in all calculations. R<sub>1</sub> = 0.0588, wR<sub>2</sub> = 0.1190 for I > 2σ(I), and R<sub>1</sub> = 0.0620, wR<sub>2</sub> = 0.1196 for all unique reflections. Max./min. residual electron densities 3.62 and -2.15 e Å<sup>-3</sup>. CSD ref.: 944061. **4** was prepared in a similar manner, under slightly milder conditions (room temperature, 4 d) and recrystallized from 1,2-difluorobenzene as pale yellow crystals. Isolated yield of single crystals: 0.052 g (40%). <sup>1</sup>H NMR (500 MHz, bromobenzene-d<sub>5</sub>, 298 K): δ<sub>H</sub> 1.00 (d, 12H, <sup>3</sup>J<sub>HH</sub> = 7.0 Hz CH<sub>3</sub> of Dipp<sup>i</sup>Pr), 1.24 (d, 12H, <sup>3</sup>J<sub>HH</sub> = 7.0 Hz CH<sub>3</sub> of Dipp<sup>i</sup>Pr), 1.58 (s, 6H, CH<sub>3</sub> of β-diketiminato backbone), 2.87 (sept, 4H, <sup>3</sup>J<sub>HH</sub> = 7.0 Hz, CH of Dipp<sup>i</sup>Pr), 5.22 (s, 1H, γ-CH), 7.16–7.07 (m, 12H, ArH). <sup>13</sup>C NMR (126 MHz, bromobenzene-d<sub>5</sub>, 298 K): δ<sub>C</sub> 24.0, 24.6, 24.6 (CH<sub>3</sub> of Dipp<sup>i</sup>Pr and β-diketiminato backbone), 29.4 (CH of Dipp<sup>i</sup>Pr), 101.5 (γ-CH), 124.8 (Ar-C), 128.5 (Ar-C), 140.8 (Ar-C), 142.6 (Ar-C), 168.3 (NC), 208.0 (CO), 212.5 (CO). IR (CH<sub>2</sub>Cl<sub>2</sub>, ν<sub>CO</sub>/cm<sup>-1</sup>): 1932 (b), 1979 (s), 2059 (s). EI-MS: m/z 471 [M-Mo(CO)<sub>5</sub>(CH<sub>3</sub>)<sup>+</sup>, 100%), 724 ([M]<sup>+</sup>, 6%). Elemental microanalysis: calcd. for C<sub>34</sub>H<sub>41</sub>N<sub>2</sub>O<sub>5</sub>GaMo: C 56.43% H 5.72% N 3.87% meas. C 55.78% H 5.57% N 3.45%. Crystallographic data: C<sub>34</sub>H<sub>41</sub>N<sub>2</sub>O<sub>5</sub>GaMo, M<sub>r</sub> = 723.36, tetragonal, P4<sub>3</sub>2<sub>1</sub>2, a = 9.08300(10), b = 9.08300(10), c = 41.8928(5) Å, V = 3456.19(7) Å<sup>3</sup>, Z = 4, ρ<sub>c</sub> = 1.390 Mg m<sup>-3</sup>, T = 150(2) K, λ = 0.71073 Å. 3933 independent reflections [R(int) = 0.052], used in all calculations. R<sub>1</sub> = 0.0543, wR<sub>2</sub> = 0.1170 for I > 2σ(I), and R<sub>1</sub> = 0.0659, wR<sub>2</sub> = 0.1298 for all unique reflections. Max./min. residual electron densities 3.07 and -1.45 e Å<sup>-3</sup>. CSD ref.: 944060.

**7:** A stirred solution of **1** (0.300 g, 0.613 mmol) and Mn<sub>2</sub>CO<sub>10</sub> (0.239 g, 0.613 mmol) in toluene (15 mL) was subjected to UV photolysis at room temperature for 6 h, after which time <sup>1</sup>H NMR indicated quantitative conversion to **7** and HMn(CO)<sub>5</sub>. The reaction mixture was filtered and volatiles removed *in vacuo*. The resulting solid was extracted into diethyl ether and cooled to -30 °C to yield yellow crystals of **7**. The crystals were isolated by filtration and dried *in vacuo*. Isolated yield of single crystals: 0.077 g, 19% (*in situ* monitoring of the reaction by <sup>1</sup>H NMR in benzene-d<sub>6</sub> is consistent with *ca.* 90% conversion of **1** to **7**; the lower isolated yield reflects – at least in part – the high solubility of **7** in compatible hydrocarbon solvents and its high sensitivity to air/moisture, resulting in relatively inefficient recrystallization). <sup>1</sup>H NMR (500 MHz, C<sub>6</sub>D<sub>6</sub>, 298 K): δ<sub>H</sub> -9.58 (s, 1H, MnH), 1.02 (d, 12H, <sup>3</sup>J<sub>HH</sub> = 7.5 Hz CH<sub>3</sub> of Dipp<sup>i</sup>Pr), 1.40 (d, 12H, <sup>3</sup>J<sub>HH</sub> = 7.5 Hz CH<sub>3</sub> of Dipp<sup>i</sup>Pr), 1.51 (s, 6H, CH<sub>3</sub> of Nacnac backbone), 3.00 (sept, 4H, <sup>3</sup>J<sub>HH</sub> = 7.5 Hz CH of Dipp<sup>i</sup>Pr), 5.06 (s, 1H, γ-CH), 7.08–7.20 (overlapping m, 6H, ArH). <sup>13</sup>C NMR (126 MHz, CD<sub>2</sub>Cl<sub>2</sub>, 298 K): 24.3, 24.6 (CH<sub>3</sub> of Dipp<sup>i</sup>Pr), 24.3 (CH<sub>3</sub> of β-diketiminato backbone), 29.2 (γ-CH of Dipp<sup>i</sup>Pr), 101.2 (γ-C), 124.9, 128.6, 140.5, 143.6 (ArC), 169.6 (CN), 220 (br. CO). IR (CH<sub>2</sub>Cl<sub>2</sub>, ν<sub>CO</sub>/cm<sup>-1</sup>): 1922 (b), 1951 (b), 2011 (s), 2043 (s). EI-MS: m/z 542.2 ([M-4(CO)]<sup>+</sup>, 100%), 654.2 ([M]<sup>+</sup>, 12%). Elemental microanalysis: calcd. for C<sub>33</sub>H<sub>42</sub>N<sub>2</sub>O<sub>4</sub> GaMn: C 60.46% H 6.46% N 4.28%, meas. C 60.12%

H 6.71% N 4.70%. Crystallographic data:  $C_{33}H_{42}N_2O_4GaMn$ ,  $M_r = 655.36$ , monoclinic,  $P2_1/m$ ,  $a = 8.86000(10)$ ,  $b = 21.5544(2)$ ,  $c = 9.08180(10)$  Å,  $\beta = 108.601(1)^\circ$ ,  $V = 1643.8(1)$  Å<sup>3</sup>,  $Z = 2$ ,  $\rho_c = 1.324$  Mg m<sup>-3</sup>,  $T = 150(2)$  K,  $\lambda = 0.71073$  Å. 3844 indep. reflns [R(int) = 0.025], used in all calcs.  $R_1 = 0.0293$ ,  $wR_2 = 0.0653$  for  $I > 2\sigma(I)$ , and  $R_1 = 0.0435$ ,  $wR_2 = 0.0787$  for all unique reflns. Max./min. residual electron densities 0.62, -0.61 e Å<sup>-3</sup>. CSD ref.: 944063.

**8**: A solution of **1** (0.200 g, 0.409 mmol) and  $Cl_2Ga\{NDippCMe\}_2CH$  (0.228 g, 0.409 mmol) in toluene (20 mL) was heated to 70 °C for 48 h. The solvent was removed *in vacuo* and the resultant colourless solid extracted in diethyl ether. Concentration and cooling the ethereal solution to -30 °C yielded colourless crystals of **8**. Isolated yield of single crystals: 0.259 g, 60%. <sup>1</sup>H NMR (300 MHz, benzene-d<sub>6</sub>, 298 K):  $\delta_H$  1.08 (d, 6H, <sup>3</sup>J<sub>HH</sub> = 6.9 Hz CH<sub>3</sub> of Dipp<sup>t</sup>Pr), 1.16 (d, 6H, <sup>3</sup>J<sub>HH</sub> = 6.9 Hz CH<sub>3</sub> of Dipp<sup>t</sup>Pr), 1.27 (d, 6H, <sup>3</sup>J<sub>HH</sub> = 7.2 Hz CH<sub>3</sub> of Dipp<sup>t</sup>Pr), 1.51 (d, 6H, <sup>3</sup>J<sub>HH</sub> = 7.2 Hz CH<sub>3</sub> of Dipp<sup>t</sup>Pr), 1.54 (s, 6H, CH<sub>3</sub> of  $\beta$ -diketiminato backbone), 3.19 (sept, 2H, <sup>3</sup>J<sub>HH</sub> = 6.9 Hz, CH of Dipp<sup>t</sup>Pr), 3.64 (sept, 2H, <sup>3</sup>J<sub>HH</sub> = 7.2 Hz, CH of Dipp<sup>t</sup>Pr), 4.79 (s, 1H,  $\gamma$ -CH), 5.47 (br s, 1H, GaH), 7.03 – 7.14 (m, 6H, ArH). <sup>13</sup>C NMR (126 MHz, benzene-d<sub>6</sub>, 298 K):  $\delta_C$  23.3 (CH<sub>3</sub> of  $\beta$ -diketiminato backbone), 24.8 (CH<sub>3</sub> of Dipp<sup>t</sup>Pr), 24.8 (CH<sub>3</sub> of Dipp<sup>t</sup>Pr), 26.1 (CH<sub>3</sub> of Dipp<sup>t</sup>Pr), 28.3 (CH of Dipp<sup>t</sup>Pr), 28.8 (CH of Dipp<sup>t</sup>Pr), 96.3 ( $\gamma$ -CH), 124.4 (Ar-C), 125.2 (Ar-C), 139.8 (Ar-C), 143.2 (Ar-C), 145.6 (Ar-C), 169.5 (CN). EI-MS :  $m/z$  524.22 ([M]<sup>+</sup>, 3%); accurate mass : calc. 524.2281, meas. 524.2283. Elemental microanalysis: calcd. for  $C_{29}H_{42}ClGaN_2$ : C 66.49% H 8.08% N 5.35% meas. C 65.91% H 8.49% N 5.13%.

**9**: A solution of **8** (0.100 g, 0.191 mmol) in toluene (10 mL) was added to a solution of  $Co_2(CO)_8$  (0.065 g, 0.191 mmol), also in toluene (10 mL). Immediate gas evolution was observed and the solution was stirred for 2 h at room temperature. Volatiles were removed *in vacuo* and the resultant solid extracted into hexanes. Storage of the hexane solution at -30 °C yielded pale yellow crystals of **9**. Isolated yield of single crystals: 0.020g, 15% (*in situ* monitoring of the reaction by <sup>1</sup>H NMR in benzene-d<sub>6</sub> is consistent with ca. 90% conversion of **8** to **9**; the lower isolated yield reflects – at least in part – the high solubility of **9** in compatible hydrocarbon solvents and its high sensitivity to air/moisture, resulting in relatively inefficient recrystallization). <sup>1</sup>H NMR (300 MHz, benzene-d<sub>6</sub>, 298 K):  $\delta_H$  1.10 (d, 6H, <sup>3</sup>J<sub>HH</sub> = 6.9 Hz CH<sub>3</sub> of Dipp<sup>t</sup>Pr), 1.40 (d, 6H, <sup>3</sup>J<sub>HH</sub> = 6.9 Hz CH<sub>3</sub> of Dipp<sup>t</sup>Pr), 1.54 (d, 6H, <sup>3</sup>J<sub>HH</sub> = 6.9 Hz CH<sub>3</sub> of Dipp<sup>t</sup>Pr), 1.62 (s, 6H, CH<sub>3</sub> of  $\beta$ -diketiminato backbone), 3.29 (sept, 2H, <sup>3</sup>J<sub>HH</sub> = 6.9 Hz, CH of Dipp<sup>t</sup>Pr), 3.73 (sept, 2H, <sup>3</sup>J<sub>HH</sub> = 6.9 Hz, CH of Dipp<sup>t</sup>Pr), 4.91 (s, 1H,  $\gamma$ -CH), 7.07 – 7.17 (m, 6H, ArH). <sup>13</sup>C NMR (126 MHz, benzene-d<sub>6</sub>, 298 K): 24.5 (CH<sub>3</sub> of  $\beta$ -diketiminato backbone), 24.8 (CH<sub>3</sub> of Dipp<sup>t</sup>Pr), 24.9 (CH<sub>3</sub> of Dipp<sup>t</sup>Pr), 25.4 (CH<sub>3</sub> of Dipp<sup>t</sup>Pr), 25.6 (CH<sub>3</sub> of Dipp<sup>t</sup>Pr), 28.5 (CH of Dipp<sup>t</sup>Pr), 29.2 (CH of Dipp<sup>t</sup>Pr), 98.0 ( $\gamma$ -CH), 124.7 (Ar-C), 125.2 (Ar-C), 140.3 (Ar-C), 144.3 (Ar-C), 145.8 (Ar-C), 170.5 (CN), 199.3 (CO), 201.3 (CO). IR (CH<sub>2</sub>Cl<sub>2</sub>,  $\nu_{CO}/cm^{-1}$ ): 1968 (s), 2000 (s), 2015 (s), 2083 (s). EI-MS :  $m/z$  471 ([M-Co(CO)<sub>4</sub>-Cl-Me]<sup>+</sup>, 55%), 506 ([M-Co(CO)<sub>4</sub>-CH<sub>3</sub>]<sup>+</sup>, 28%), 558 ([M-3CO-Cl-CH<sub>3</sub>]<sup>+</sup>, 12%). Contamination even of crystalline samples with small quantities of  $Co_4(CO)_{12}$  meant that C/H elemental microanalyses for **9** were reproducibly low. Crystallographic data:  $C_{33}H_{41}N_2O_4ClGaCo$ ,  $M_r = 693.80$ , monoclinic,  $C2/c$ ,  $a = 21.42720(10)$ ,  $b = 16.89020(10)$ ,  $c = 21.5723(2)$  Å,  $\beta = 108.7295(4)^\circ$ ,  $V = 7393.79(9)$  Å<sup>3</sup>,  $Z = 8$ ,  $\rho_c = 1.246$  Mg m<sup>-3</sup>,  $T = 150(2)$  K,  $\lambda = 0.71073$  Å. 8414 independent reflections [R(int) = 0.024], used in all calculations.  $R_1 = 0.0333$ ,  $wR_2 = 0.0816$  for  $I > 2\sigma(I)$ , and  $R_1 = 0.0480$ ,  $wR_2 = 0.0992$  for all unique reflections. Max./min. residual electron densities 0.56 and -0.61 e Å<sup>-3</sup>. CSD ref.: 944065.

**[(OC)<sub>4</sub>CoGa{(NDippCMe)<sub>2</sub>CH}][BAR<sup>f</sup><sub>4</sub>]**: A solution of **8** (0.100 g, 0.191 mmol) in toluene (10 mL) was added to a solution of  $Co_2(CO)_8$  (0.065 g, 0.191 mmol) in toluene (10 mL) and the reaction mixture stirred at room temperature for 30 min, after which time <sup>1</sup>H NMR spectroscopy revealed quantitative conversion to compound **9**. Volatiles were removed *in vacuo* and the resulting solid extracted into dichloromethane (5 mL). This solution was added to a suspension of Na[BAR<sup>f</sup><sub>4</sub>] (0.169 g, 0.191 mmol) in dichloromethane (5 mL), and a colourless precipitate was formed immediately. The reaction mixture was stirred at room temperature for 30 min, after which time it was filtered and volatiles removed *in vacuo*. The resulting solid was washed with hexane (3 x 5 mL) and dried *in vacuo* to yield a spectroscopically pure, pale yellow powder (0.256 g, 88% yield). This solid was extracted into fluorobenzene and layered with hexane. Storage at room temperature yielded pale yellow crystals suitable for X-ray diffraction. Isolated yield of single crystals: 0.207 g, 71%. <sup>1</sup>H NMR (300 MHz, dichloromethane-d<sub>2</sub>, 298 K):  $\delta_H$  1.24 (d, <sup>3</sup>J<sub>HH</sub> = 6.9 Hz, 12H, CH<sub>3</sub> of Dipp<sup>t</sup>Pr), 1.26 (d, <sup>3</sup>J<sub>HH</sub> = 6.9 Hz, 12H, CH<sub>3</sub> of Dipp<sup>t</sup>Pr), 2.14 (s, 6H, CH<sub>3</sub> of  $\beta$ -diketiminato backbone), 2.74 (sept, <sup>3</sup>J<sub>HH</sub> = 6.9 Hz, 4H, CH of Dipp<sup>t</sup>Pr), 6.07 (s, 1H,  $\gamma$ -CH), 7.36 (d, <sup>3</sup>J<sub>HH</sub> = 7.5 Hz, 4H, *m*-CH of Dipp), 7.48 (t, <sup>3</sup>J<sub>HH</sub> = 7.5 Hz, 2H, *p*-CH of Dipp), 7.56 (s, 4H, *p*-CH of [BAR<sup>f</sup><sub>4</sub>]), 7.72 (s, 8H, *o*-CH of [BAR<sup>f</sup><sub>4</sub>]). <sup>13</sup>C NMR (75 MHz, dichloromethane-d<sub>2</sub>, 298 K):  $\delta_C$  24.6, 25.1, 25.2 (CH<sub>3</sub> of Dipp<sup>t</sup>Pr and  $\beta$ -diketiminato backbone), 29.6 (CH of Dipp<sup>t</sup>Pr), 104.9 ( $\gamma$ -C), 118.0 (*p*-CH of [BAR<sup>f</sup><sub>4</sub>]), 125.2 (q, <sup>1</sup>J<sub>CF</sub> = 271 Hz, CF<sub>3</sub> of [BAR<sup>f</sup><sub>4</sub>]), 126.4, 131.2, 136.8, 143.5 (ArC of Dipp) 129.5 (q, <sup>2</sup>J<sub>CF</sub> = 34.3 Hz, *m*-C of [BAR<sup>f</sup><sub>4</sub>]), 135.4 (*o*-CH of [BAR<sup>f</sup><sub>4</sub>]), 162.3 (q, <sup>1</sup>J<sub>CB</sub> = 49.2 Hz, *ipso*-C of [BAR<sup>f</sup><sub>4</sub>]), 175.3 (NC), 192.6 (br s, CO). <sup>11</sup>B NMR (96 MHz, dichloromethane-d<sub>2</sub>, 298 K):  $\delta_B$  -6.8. <sup>19</sup>F NMR (282 MHz, dichloromethane-d<sub>2</sub>, 298 K):  $\delta_F$  -62.8. IR (KBr disc,  $\nu_{CO}/cm^{-1}$ ): 2025 (s), 2047 (s), 2121 (s). ESI-MS (cation) : 657 ([M]<sup>+</sup>, 18%); accurate mass: calc. 657.1649, meas. 657.1635. Elemental microanalysis: calc. (for  $C_{65}H_{53}N_2O_4F_{24}GaCoB$ ) C 51.31% H 3.51% N 1.84%; meas. C 51.45% H 3.50% N 1.87%. Crystallographic data:  $C_{65}H_{53}N_2O_4CoF_{24}GaMn$ ,  $M_r = 1521.56$ , triclinic,  $P-1$ ,  $a = 12.5663(2)$ ,  $b = 13.2686(3)$ ,  $c = 20.7262(4)$  Å,  $\alpha = 78.486(2)$ ,  $\beta = 83.945(2)$ ,  $\gamma = 83.491(2)^\circ$ ,  $V = 3352.3(1)$  Å<sup>3</sup>,  $Z = 4$ ,  $\rho_c = 1.507$  Mg m<sup>-3</sup>,  $T = 150(2)$  K,  $\lambda = 1.54180$  Å. 13907 independent reflections [R(int) = 0.023], used in all calculations.  $R_1 = 0.0489$ ,  $wR_2 = 0.1201$  for  $I > 2\sigma(I)$ , and  $R_1 = 0.0521$ ,  $wR_2 = 0.1228$  for all unique reflections. Max./min. residual electron densities 1.74 and -1.09 e Å<sup>-3</sup>. CSD ref.: 952955.

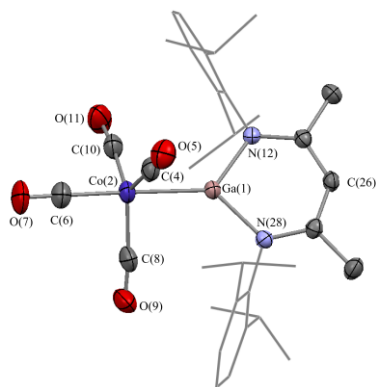

**Figure S1:** Molecular structure of the cationic component of  $[(OC)_4CoGa\{(NDippCMe)_2CH\}][BAR_f^4]$ . H atoms and counter-anion omitted, and Dipp groups shown in wireframe format for clarity. Thermal ellipsoids set at the 50% probability level.

### 3. Details of DFT calculations

The DFT calculations were performed using the Amsterdam Density Functional (ADF) Package Software 2012 and 2013.<sup>S4</sup> Calculations were performed using the Vosko-Wilk-Nusair local density approximation with exchange from Becke,<sup>S5</sup> and correlation corrections from Perdew (BP).<sup>S6</sup> Slater-type orbitals (STOs)<sup>S7</sup> were used for the triple zeta basis set with an additional set of polarization functions (TZP). The large frozen core basis set approximation was applied with no molecular symmetry. General numerical integration was 6.

Thermodynamic data was obtained from frequency calculations conducted on the optimised geometries of the species, calculated as detailed above. Analysis of the bonding in complex **5** was conducted using the ETS-NOCV approach,<sup>S8</sup> and the relevant run file is listed below. Run files for the frequency calculations are found below and complete output files provided upon request.

#### 3a. The model system Fe(CO)<sub>4</sub> + H<sub>2</sub>Ga{(NMeCMe)<sub>2</sub>CH}

```
#!/bin/sh

# =====
# Fe(CO)4
# =====

"$ADFBIN/ADF" <<eor
ATOMS
1 C      0.935647735200      4.145000000000      15.941447960000
2 C      3.319089802000      5.745592402000      17.336860370000
3 C      1.635012872000      4.145000000000      18.388866260000
4 O      1.046728286000      4.145000000000      19.390355660000
5 O      3.772238038000      1.537793833000      17.689650720000
6 Fe     2.518334654000      4.145000000000      16.886484090000
7 C      3.319089802000      2.544407598000      17.336860370000
8 O     -0.092075079320      4.145000000000      15.405742340000
9 O      3.772238038000      6.752206167000      17.689650720000
END
```

```
GUIBONDS
1 1 8 2.0
2 1 6 2.0
3 2 9 2.0
4 2 6 2.0
5 3 4 2.0
6 3 6 1.5
7 6 7 1.5
8 7 5 2.0
END

BASIS
type TZP
core Large
createoutput None
END

XC

GGA Becke Perdew
END

SCANFREQ -1000 0

AnalyticalFreq
END

SAVE TAPE21 TAPE13

FULLSCF
INTEGRATION 6.0

NOPRINT LOGFILE

eor

#! /bin/sh

# =====
# MeNacNacGaH2
# =====

"$ADFBIN/adf" <<eor
ATOMS
1 H      2.201593941000    4.153201807000    14.898703330000
2 H      4.982015829000    0.658967441000    13.352769630000
3 H      3.203737040000    0.716005908600    13.238016520000
4 C      4.065213720000    7.019526069000    13.665684010000
5 H      4.021853543000    1.252044094000    14.718993140000
6 H      5.521027491000    1.103108638000    11.214619320000
7 C      4.090935367000    1.246954116000    13.624274460000
8 N      4.161376711000    2.622851252000    13.137438730000
9 H      4.774351821000    2.021570906000    9.888387022000
10 H     3.776182867000    0.992412219300    10.944579920000
11 C     4.418313325000    2.861026886000    11.851711870000
12 H     4.735543109000    4.138022804000    10.201434960000
13 H     3.759953230000    7.254096292000    10.839789130000
14 C     4.414050508000    5.431886668000    11.841980900000
15 C     4.520406720000    4.143262144000    11.267967810000
16 C     4.638584040000    6.594205329000    10.885517460000
17 H     5.498353447000    7.207190555000    11.193553680000
18 H     4.820473620000    7.151772391000    14.458009530000
19 H     3.076907869000    7.183012781000    14.126009470000
20 H     4.221723925000    7.802390253000    12.914985230000
21 N     4.143363510000    5.668748065000    13.122775300000
22 Ga    3.775406039000    4.145705287000    14.533880030000
23 H     4.964908114000    4.149463321000    15.627862970000
24 H     4.834794738000    6.221181744000    9.875354747000
25 C     4.632644111000    1.682271048000    10.919508710000
END

GUIBONDS
1 21 22 1.0
2 5 7 1.0
3 2 7 1.0
4 18 4 1.0
5 3 7 1.0
6 19 4 1.0
7 22 8 1.0
8 20 4 1.0
9 4 21 1.0
10 23 22 1.0
11 1 22 1.0
12 14 21 1.0
13 25 9 1.0
14 25 10 1.0
15 14 15 1.5
16 14 16 1.0
17 15 12 1.0
18 15 11 1.5
19 16 24 1.0
20 16 13 1.0

21 16 17 1.0
22 25 6 1.0
23 11 8 1.0
24 11 25 1.0
25 7 8 1.0
END

BASIS
type TZP
core Large
createoutput None
END

XC
GGA Becke Perdew
END

SCANFREQ -1000 0
```

```
AnalyticalFreq  
END  
  
SAVE TAPE21 TAPE13  
  
FULLSCF
```

```
INTEGRATION 6.0  
  
NOPRINT LOGFILE  
  
eor
```

```
#!/bin/sh
```

```
# =====  
# Fe gallyl (anti)  
# =====
```

```
"$ADFBIN/adf" <<eor
```

```
ATOMS
```

|       |                |                |                 |
|-------|----------------|----------------|-----------------|
| 1 C   | 1.202891619000 | 4.987041302000 | 16.568402730000 |
| 2 C   | 3.955180072000 | 5.329359404000 | 16.236910260000 |
| 3 C   | 2.982220027000 | 4.140490749000 | 18.516439590000 |
| 4 C   | 2.197272049000 | 6.504767971000 | 12.978485590000 |
| 5 O   | 1.803070513000 | 1.242310474000 | 16.532878890000 |
| 6 H   | 7.069192143000 | 2.042863687000 | 13.590756700000 |
| 7 C   | 4.479263560000 | 1.268285500000 | 13.765294590000 |
| 8 N   | 4.395866624000 | 2.695304839000 | 13.455180370000 |
| 9 H   | 7.517277029000 | 3.205765302000 | 12.317288360000 |
| 10 H  | 6.556846468000 | 1.764932089000 | 11.920006330000 |
| 11 C  | 5.448162400000 | 3.329942668000 | 12.933066470000 |
| 12 H  | 6.416489307000 | 5.049389204000 | 12.179163870000 |
| 13 H  | 4.163059140000 | 7.231703586000 | 11.116567440000 |
| 14 C  | 4.434708114000 | 5.656985400000 | 12.583157270000 |
| 15 C  | 5.466055605000 | 4.694339352000 | 12.572200350000 |
| 16 C  | 4.771863622000 | 7.017915684000 | 12.008061600000 |
| 17 H  | 4.570070326000 | 7.816268528000 | 12.737123870000 |
| 18 O  | 0.214272084200 | 5.586965873000 | 16.481880210000 |
| 19 O  | 4.768283925000 | 6.121063523000 | 15.998117150000 |
| 20 O  | 3.135153819000 | 4.193281892000 | 19.662999470000 |
| 21 N  | 3.200065518000 | 5.442228625000 | 13.044573740000 |
| 22 Ga | 2.688590363000 | 3.710945893000 | 14.088488970000 |
| 23 Fe | 2.769262900000 | 4.044369340000 | 16.712805730000 |
| 24 H  | 5.826528127000 | 7.067993222000 | 11.719706160000 |
| 25 C  | 6.720968725000 | 2.546644684000 | 12.677217640000 |
| 26 C  | 2.136806646000 | 2.354019477000 | 16.583453490000 |
| 27 H  | 5.117717670000 | 1.073234486000 | 14.643446200000 |
| 28 H  | 4.873549732000 | 0.684795968200 | 12.920197340000 |
| 29 H  | 3.476810611000 | 0.886946984400 | 13.991225640000 |
| 30 H  | 2.420312223000 | 7.329750192000 | 13.675816690000 |
| 31 H  | 1.216857939000 | 6.094345663000 | 13.247500940000 |
| 32 H  | 2.112570569000 | 6.928437729000 | 11.966532880000 |
| 33 H  | 4.078408872000 | 3.242105729000 | 16.629979690000 |
| 34 H  | 1.342424288000 | 3.063554918000 | 13.470077700000 |

```
END
```

```
GUIBONDS
```

```
1 1 18 2.0  
2 1 23 2.0  
3 2 19 2.0  
4 2 23 2.0  
5 3 20 2.0  
6 3 23 1.5  
7 22 8 1.0  
8 22 23 3  
9 4 21 1.0  
10 23 26 1.5  
11 26 5 2.0  
12 14 21 1.0  
13 25 9 1.0  
14 25 10 1.0  
15 14 15 1.5  
16 14 16 1.0  
17 15 12 1.0  
18 15 11 1.5  
19 16 24 1.0  
20 16 13 1.0  
21 16 17 1.0  
22 25 6 1.0  
23 11 8 1.0
```

```
24 11 25 1.0  
25 7 8 1.0  
26 21 22 1.0  
27 27 7 1.0  
28 28 7 1.0  
29 29 7 1.0  
30 30 4 1.0  
31 31 4 1.0  
32 32 4 1.0  
33 23 33 1.0  
34 34 22 1.0  
END
```

```
BASIS
```

```
type TZP  
core Large  
createoutput None  
END
```

```
XC
```

```
GGA Becke Perdew  
END
```



SCANFREQ -1000 0

AnalyticalFreq  
END

SAVE TAPE21 TAPE13

#!/bin/sh

# =====  
# Fe transition state gallyl (anti) to gallyl (syn)  
# =====

"\$ADFBIN/adf" <<eor

ATOMS

|       |                |                |                 |
|-------|----------------|----------------|-----------------|
| 1 C   | 1.673701995000 | 5.425383597000 | 16.458100730000 |
| 2 C   | 4.344673878000 | 4.691543205000 | 16.329011650000 |
| 3 C   | 2.861878523000 | 4.020290889000 | 18.531106890000 |
| 4 C   | 1.658685563000 | 6.012751996000 | 12.824304650000 |
| 5 O   | 0.729783364400 | 1.769771571000 | 16.526291160000 |
| 6 H   | 7.486820890000 | 2.979460853000 | 13.701743110000 |
| 7 C   | 5.157906950000 | 1.565829842000 | 13.962473130000 |
| 8 N   | 4.725689710000 | 2.902449735000 | 13.556193810000 |
| 9 H   | 7.617318333000 | 4.058673353000 | 12.291212200000 |
| 10 H  | 7.045541672000 | 2.386809800000 | 12.093913430000 |
| 11 C  | 5.589664555000 | 3.734849479000 | 12.970412730000 |
| 12 H  | 6.108901661000 | 5.578596856000 | 12.080893360000 |
| 13 H  | 3.391739153000 | 7.056339934000 | 10.905694720000 |
| 14 C  | 4.040210086000 | 5.716900803000 | 12.482956760000 |
| 15 C  | 5.274076972000 | 5.033109192000 | 12.516161080000 |
| 16 C  | 4.034530727000 | 7.069745784000 | 11.798921780000 |
| 17 H  | 3.641613919000 | 7.851023289000 | 12.466045660000 |
| 18 O  | 1.008107685000 | 6.364568343000 | 16.316211090000 |
| 19 O  | 5.412917513000 | 5.107403310000 | 16.156569690000 |
| 20 O  | 2.959787576000 | 4.049505215000 | 19.684262150000 |
| 21 N  | 2.895522054000 | 5.248013476000 | 12.986294880000 |
| 22 Ga | 2.803786641000 | 3.492491104000 | 14.116837730000 |
| 23 Fe | 2.733598007000 | 3.954472780000 | 16.717783630000 |
| 24 H  | 5.044730587000 | 7.353178925000 | 11.487198060000 |
| 25 C  | 7.015060396000 | 3.268881348000 | 12.751046290000 |
| 26 C  | 1.481742179000 | 2.651315320000 | 16.577581480000 |
| 27 H  | 5.914909158000 | 1.599295671000 | 14.763507320000 |
| 28 H  | 5.578037128000 | 0.995171066400 | 13.119733720000 |
| 29 H  | 4.295470792000 | 1.006486191000 | 14.343695530000 |
| 30 H  | 1.675324413000 | 6.959096946000 | 13.388597880000 |
| 31 H  | 0.814907043200 | 5.419592166000 | 13.195775570000 |
| 32 H  | 1.458134850000 | 6.247680670000 | 11.767429770000 |
| 33 H  | 3.627866238000 | 2.700236994000 | 16.729559020000 |
| 34 H  | 1.691609375000 | 2.494313477000 | 13.498477020000 |

END

GUIBONDS

|              |
|--------------|
| 1 1 18 2.0   |
| 2 1 23 2.0   |
| 3 2 19 2.0   |
| 4 2 23 2.0   |
| 5 3 20 2.0   |
| 6 3 23 1.5   |
| 7 22 8 1.0   |
| 8 22 23 3    |
| 9 4 21 1.0   |
| 10 23 26 1.5 |
| 11 26 5 2.0  |
| 12 14 21 1.0 |
| 13 25 9 1.0  |
| 14 25 10 1.0 |
| 15 14 15 1.5 |
| 16 14 16 1.0 |
| 17 15 12 1.0 |
| 18 15 11 1.5 |
| 19 16 24 1.0 |
| 20 16 13 1.0 |
| 21 16 17 1.0 |
| 22 25 6 1.0  |
| 23 11 8 1.0  |
| 24 11 25 1.0 |

FULLSCF  
INTEGRATION 6.0

NOPRINT LOGFILE

eor

|              |
|--------------|
| 25 7 8 1.0   |
| 26 21 22 1.0 |
| 27 27 7 1.0  |
| 28 28 7 1.0  |
| 29 29 7 1.0  |
| 30 30 4 1.0  |
| 31 31 4 1.0  |
| 32 32 4 1.0  |
| 33 23 33 1.0 |
| 34 34 22 1.0 |

END

BASIS  
type TZP  
core Large  
createoutput None  
END

XC  
GGA Becke Perdew  
END

SCANFREQ -1000 0

AnalyticalFreq  
END

SAVE TAPE21 TAPE13

SCF  
diis  
END

#!/bin/sh

# =====  
# Fe gallyl (syn)  
# =====

"\$ADFBIN/adf" <<eor

ATOMS

|       |                |                |                 |
|-------|----------------|----------------|-----------------|
| 1 C   | 4.634025752000 | 3.767838961000 | 16.769181450000 |
| 2 C   | 2.227975992000 | 2.365976476000 | 16.680617970000 |
| 3 C   | 2.543177835000 | 4.459069749000 | 18.448159440000 |
| 4 C   | 1.583428203000 | 5.918195784000 | 12.640781830000 |
| 5 O   | 2.805368436000 | 6.878680168000 | 15.717383840000 |
| 6 H   | 7.446459243000 | 3.017062519000 | 13.803623500000 |
| 7 C   | 5.132016847000 | 1.575773492000 | 13.788706200000 |
| 8 N   | 4.708930659000 | 2.947067412000 | 13.506181160000 |
| 9 H   | 7.649727903000 | 4.259495120000 | 12.541480960000 |
| 10 H  | 7.120798226000 | 2.619407131000 | 12.109699170000 |
| 11 C  | 5.588502069000 | 3.837214727000 | 13.040583930000 |
| 12 H  | 6.108161617000 | 5.761559295000 | 12.334289340000 |
| 13 H  | 3.430529607000 | 7.124806336000 | 10.927797170000 |
| 14 C  | 4.002871571000 | 5.778800196000 | 12.527846110000 |
| 15 C  | 5.263866261000 | 5.158868313000 | 12.663156250000 |
| 16 C  | 3.982898061000 | 7.147772928000 | 11.879379800000 |
| 17 H  | 3.482572745000 | 7.883262744000 | 12.526275460000 |
| 18 O  | 5.774471395000 | 3.572556609000 | 16.836204870000 |
| 19 O  | 1.776187406000 | 1.296888840000 | 16.702824180000 |
| 20 O  | 2.344612353000 | 4.709380365000 | 19.560955080000 |
| 21 N  | 2.845815098000 | 5.228925257000 | 12.905043080000 |
| 22 Ga | 2.791486570000 | 3.521431658000 | 14.099885600000 |
| 23 Fe | 2.828261027000 | 4.076122928000 | 16.694097420000 |
| 24 H  | 4.999787995000 | 7.496628973000 | 11.673373240000 |
| 25 C  | 7.033185436000 | 3.414937193000 | 12.865343430000 |
| 26 C  | 2.862593162000 | 5.771415421000 | 16.061659880000 |
| 27 H  | 5.826596763000 | 1.522564692000 | 14.643267090000 |
| 28 H  | 5.624039305000 | 1.110984073000 | 12.920563460000 |
| 29 H  | 4.251616395000 | 0.969314155900 | 14.031860070000 |
| 30 H  | 1.483804689000 | 6.842781166000 | 13.232310430000 |
| 31 H  | 0.750264335600 | 5.256754393000 | 12.907064910000 |
| 32 H  | 1.473264384000 | 6.177866135000 | 11.576752450000 |
| 33 H  | 1.328880552000 | 4.308120375000 | 16.430662860000 |
| 34 H  | 1.664897596000 | 2.501456015000 | 13.553649850000 |

END

GUIBONDS

|              |
|--------------|
| 1 1 18 2.0   |
| 2 1 23 2.0   |
| 3 2 19 2.0   |
| 4 2 23 2.0   |
| 5 3 20 2.0   |
| 6 3 23 1.5   |
| 7 22 8 1.0   |
| 8 22 23 3    |
| 9 4 21 1.0   |
| 10 23 26 1.5 |
| 11 26 5 2.0  |
| 12 14 21 1.0 |
| 13 25 9 1.0  |
| 14 25 10 1.0 |
| 15 14 15 1.5 |
| 16 14 16 1.0 |
| 17 15 12 1.0 |
| 18 15 11 1.5 |
| 19 16 24 1.0 |
| 20 16 13 1.0 |
| 21 16 17 1.0 |

FULLSCF  
INTEGRATION 6

NoBeckeGrid  
NOPRINT LOGFILE

eor

|              |
|--------------|
| 22 25 6 1.0  |
| 23 11 8 1.0  |
| 24 11 25 1.0 |
| 25 7 8 1.0   |
| 26 21 22 1.0 |
| 27 27 7 1.0  |
| 28 28 7 1.0  |
| 29 29 7 1.0  |
| 30 30 4 1.0  |
| 31 31 4 1.0  |
| 32 32 4 1.0  |
| 33 23 33 1.0 |
| 34 34 22 1.0 |

END

BASIS  
type TZP  
core Large  
createoutput None  
END

XC

GGA Becke Perdew  
END

SCANFREQ -1000 0

AnalyticalFreq  
END

#!/bin/sh

# =====  
# Fe transition state H2 loss  
# =====

"\$ADFBIN/adf" <<eor

ATOMS

|       |                |                |                 |
|-------|----------------|----------------|-----------------|
| 1 C   | 4.484560000000 | 4.739900000000 | 17.353300000000 |
| 2 C   | 3.126510000000 | 2.315260000000 | 16.727200000000 |
| 3 C   | 2.033470000000 | 3.979920000000 | 18.471800000000 |
| 4 C   | 2.404140000000 | 6.618730000000 | 12.972400000000 |
| 5 O   | 1.320190000000 | 6.572850000000 | 16.168100000000 |
| 6 H   | 6.795820000000 | 1.621790000000 | 12.529400000000 |
| 7 C   | 4.314360000000 | 1.227270000000 | 13.516100000000 |
| 8 N   | 4.360050000000 | 2.660530000000 | 13.218900000000 |
| 9 H   | 7.001030000000 | 2.729490000000 | 11.146900000000 |
| 10 H  | 5.771430000000 | 1.449910000000 | 11.096200000000 |
| 11 C  | 5.253570000000 | 3.140350000000 | 12.347800000000 |
| 12 H  | 6.128850000000 | 4.700830000000 | 11.226500000000 |
| 13 H  | 3.830330000000 | 6.929150000000 | 10.543400000000 |
| 14 C  | 4.402460000000 | 5.541170000000 | 12.105200000000 |
| 15 C  | 5.309830000000 | 4.479300000000 | 11.907400000000 |
| 16 C  | 4.633520000000 | 6.793090000000 | 11.283500000000 |
| 17 H  | 4.645660000000 | 7.691340000000 | 11.917000000000 |
| 18 O  | 5.540680000000 | 5.142580000000 | 17.613700000000 |
| 19 O  | 3.249320000000 | 1.155930000000 | 16.715400000000 |
| 20 O  | 1.484400000000 | 3.887280000000 | 19.489600000000 |
| 21 N  | 3.352400000000 | 5.503440000000 | 12.931800000000 |
| 22 Ga | 3.135560000000 | 3.948520000000 | 14.283200000000 |
| 23 Fe | 2.833830000000 | 4.101280000000 | 16.851100000000 |
| 24 H  | 5.583260000000 | 6.730560000000 | 10.743000000000 |
| 25 C  | 6.266030000000 | 2.185620000000 | 11.748500000000 |
| 26 C  | 1.950310000000 | 5.618100000000 | 16.393300000000 |
| 27 H  | 5.155710000000 | 0.913380000000 | 14.154400000000 |
| 28 H  | 4.330820000000 | 0.623450000000 | 12.597600000000 |
| 29 H  | 3.387700000000 | 0.996641000000 | 14.050500000000 |
| 30 H  | 2.824270000000 | 7.496060000000 | 13.489600000000 |
| 31 H  | 1.505210000000 | 6.311640000000 | 13.515600000000 |
| 32 H  | 2.097160000000 | 6.925030000000 | 11.962100000000 |
| 33 H  | 1.654850000000 | 3.567180000000 | 15.714000000000 |
| 34 H  | 1.497710000000 | 3.395280000000 | 14.567600000000 |

END

GUIBONDS

|              |
|--------------|
| 1 1 18 2.0   |
| 2 1 23 2.0   |
| 3 2 19 2.0   |
| 4 2 23 2.0   |
| 5 3 20 2.0   |
| 6 3 23 1.5   |
| 7 22 8 1.0   |
| 8 22 23 3.0  |
| 9 4 21 1.0   |
| 10 23 26 1.5 |
| 11 26 5 2.0  |
| 12 14 21 1.0 |
| 13 25 9 1.0  |
| 14 25 10 1.0 |
| 15 14 15 1.5 |
| 16 14 16 1.0 |
| 17 15 12 1.0 |
| 18 15 11 1.5 |
| 19 16 24 1.0 |
| 20 16 13 1.0 |

SAVE TAPE21 TAPE13

FULLSCF  
INTEGRATION 6.0

NOPRINT LOGFILE

eor

|              |
|--------------|
| 21 16 17 1.0 |
| 22 25 6 1.0  |
| 23 11 8 1.0  |
| 24 11 25 1.0 |
| 25 7 8 1.0   |
| 26 21 22 1.0 |
| 27 27 7 1.0  |
| 28 28 7 1.0  |
| 29 29 7 1.0  |
| 30 30 4 1.0  |
| 31 31 4 1.0  |
| 32 32 4 1.0  |
| 33 23 33 1.0 |
| 34 34 22 1.0 |

END

BASIS

type TZP  
core Large  
createoutput None  
END

XC  
GGA Becke Perdew  
END

SCANFREQ -1000 0

AnalyticalFreq  
END

#!/bin/sh

# =====  
# Fe(CO)4(Me\_NacNacGa)  
# =====

"\$ADFBIN/adf" <<eor

ATOMS

|       |                |                |                 |
|-------|----------------|----------------|-----------------|
| 1 C   | 1.129819222000 | 4.626029794000 | 15.738429210000 |
| 2 C   | 3.912304080000 | 5.431643887000 | 16.884633090000 |
| 3 C   | 1.965288571000 | 4.274998139000 | 18.188813500000 |
| 4 C   | 3.208760435000 | 6.866759191000 | 13.377586990000 |
| 5 O   | 3.316408484000 | 1.270265761000 | 17.021751450000 |
| 6 H   | 6.470820395000 | 1.459596352000 | 11.548329650000 |
| 7 C   | 4.684020610000 | 1.297040901000 | 13.625176740000 |
| 8 N   | 4.507472173000 | 2.661442979000 | 13.111013900000 |
| 9 H   | 5.870518492000 | 2.232866279000 | 10.062331560000 |
| 10 H  | 4.886994217000 | 1.011597166000 | 10.903590800000 |
| 11 C  | 4.930976380000 | 2.952751187000 | 11.869963720000 |
| 12 H  | 5.218439073000 | 4.271260320000 | 10.250368040000 |
| 13 H  | 3.307726616000 | 6.992455363000 | 10.625134670000 |
| 14 C  | 4.280833871000 | 5.419209495000 | 11.753336900000 |
| 15 C  | 4.821743942000 | 4.215280844000 | 11.262035070000 |
| 16 C  | 4.321191441000 | 6.614565457000 | 10.825156010000 |
| 17 H  | 4.889119040000 | 7.442875154000 | 11.273685100000 |
| 18 O  | 0.108527189800 | 4.945662070000 | 15.271323580000 |
| 19 O  | 4.679691080000 | 6.269518432000 | 17.153560110000 |
| 20 O  | 1.502164043000 | 4.360677680000 | 19.250660950000 |
| 21 N  | 3.743402498000 | 5.562514736000 | 12.970960070000 |
| 22 Ga | 3.605724859000 | 4.033015432000 | 14.370266760000 |
| 23 Fe | 2.679301505000 | 4.144401361000 | 16.548686910000 |
| 24 H  | 4.787380120000 | 6.352461713000 | 9.870124355000  |
| 25 C  | 5.575980359000 | 1.856901543000 | 11.047076320000 |
| 26 C  | 3.083841120000 | 2.393177099000 | 16.797721590000 |
| 27 H  | 5.746406832000 | 1.011536442000 | 13.658635790000 |
| 28 H  | 4.148366883000 | 0.559654044800 | 13.008158440000 |
| 29 H  | 4.287081761000 | 1.236374111000 | 14.642313020000 |
| 30 H  | 3.989133894000 | 7.642773041000 | 13.375372970000 |
| 31 H  | 2.811335072000 | 6.787919925000 | 14.395670340000 |
| 32 H  | 2.391567169000 | 7.193337979000 | 12.716825830000 |

GUIBONDS

1 1 18 2.0  
2 1 23 2.0  
3 2 19 2.0  
4 2 23 2.0  
5 3 20 2.0  
6 3 23 1.5  
7 22 8 1.0  
8 22 23 3  
9 4 21 1.0  
10 23 26 1.5  
11 26 5 2.0  
12 14 21 1.0  
13 25 9 1.0  
14 25 10 1.0  
15 14 15 1.5  
16 14 16 1.0  
17 15 12 1.0  
18 15 11 1.5

RESTART  
\$SCM\_RESULTDIR/SP\_43\_LT\_gallyl\_to\_dihydrogen  
\_a6\_v7\_fine.t21

SAVE TAPE21 TAPE13

FULLSCF  
INTEGRATION 6.0

NOPRINT LOGFILE

eor

19 16 24 1.0  
20 16 13 1.0  
21 16 17 1.0  
22 25 6 1.0  
23 11 8 1.0  
24 11 25 1.0  
25 7 8 1.0  
26 21 22 1.0  
27 27 7 1.0  
28 28 7 1.0  
29 29 7 1.0  
30 30 4 1.0  
31 31 4 1.0  
32 32 4 1.0  
END

BASIS  
type TZP  
core Large

createoutput None  
END

XC  
GGA Becke Perdew  
END

SCANFREQ -1000 0

AnalyticalFreq  
END

SAVE TAPE21 TAPE13

FULLSCF  
INTEGRATION 6.0

NOPRINT LOGFILE

eor

3b. The model system  $\text{Co}_2(\text{CO})_7 + \text{H}_2\text{Ga}(\text{NMeCMe})_2\text{CH}$

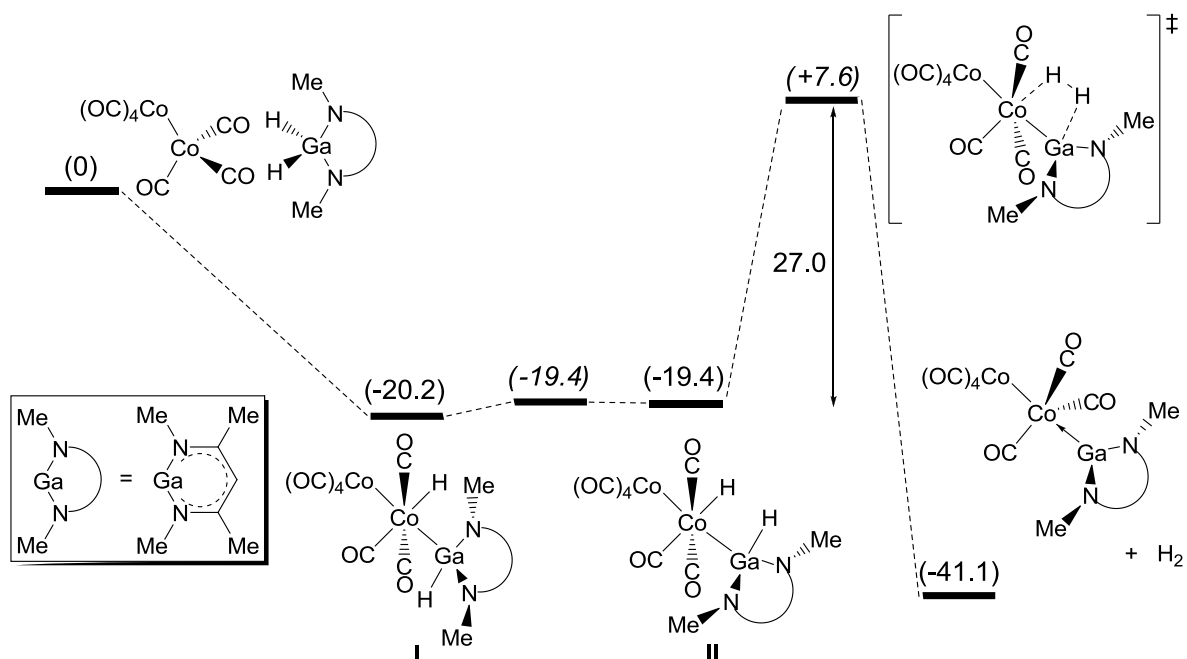

**Scheme S1:** Model for potential gallane dehydrogenation pathway at thermally generated  $[\text{Co}_2(\text{CO})_7]$ , via (hydrido)cobalt gallyl intermediates **I** and **II** (relative energies in  $\text{kcal mol}^{-1}$ ). Calculations performed using the Vosko-Wilk-Nusair local density approximation with BP86 exchange-correlation corrections. A triple zeta basis set with an additional set of polarization functions (TZP) was employed.

```
#!/bin/sh
```

```
# =====  
# Co2 (CO) 7  
# =====
```

```
"$ADFBIN/adf" <<eor
```

```
ATOMS
```

|      |                |                 |                |
|------|----------------|-----------------|----------------|
| 1 O  | 1.326889999000 | 15.052190410000 | 6.210589118000 |
| 2 Co | 3.419049043000 | 14.539626480000 | 4.131161212000 |
| 3 Co | 5.324854453000 | 14.700287760000 | 5.950576165000 |
| 4 C  | 4.707976954000 | 16.418382580000 | 6.228814901000 |
| 5 O  | 4.374818685000 | 17.499035790000 | 6.455233018000 |
| 6 C  | 6.488563430000 | 14.358053560000 | 4.556368455000 |
| 7 O  | 7.269385160000 | 14.145773950000 | 3.734809945000 |
| 8 C  | 6.621555340000 | 14.818257380000 | 7.190442525000 |
| 9 O  | 7.453238744000 | 14.895562080000 | 7.985686463000 |
| 10 C | 4.470307502000 | 13.280140900000 | 6.767948579000 |
| 11 O | 3.990111500000 | 12.393300730000 | 7.327041004000 |
| 12 C | 4.172612368000 | 15.940587190000 | 3.215079223000 |
| 13 O | 4.622036344000 | 16.822657560000 | 2.614060365000 |
| 14 C | 3.923003984000 | 12.815678910000 | 3.752153344000 |
| 15 O | 4.213051739000 | 11.725649270000 | 3.489584437000 |
| 16 C | 2.151245471000 | 14.855155730000 | 5.421446237000 |

```
END
```

```
GUIBONDS
```

```
1 14 15 2.0  
2 16 1 2.0  
3 12 13 2.0  
4 2 16 2.0  
5 2 14 2.0  
6 2 12 1.5  
7 2 3 1.5  
8 3 8 2.0  
9 3 4 2.0  
10 3 10 2.0  
11 3 6 2.0  
12 4 5 2.0  
13 6 7 2.0  
14 8 9 2.0  
15 10 11 2.0  
END
```

```
BASIS
```

```
type TZP  
core Large  
createoutput None
```

```
#!/bin/sh
```

```
# =====  
# Co gallyl (anti)  
# =====
```

```
"$ADFBIN/adf" <<eor
```

```
ATOMS
```

|      |                |                 |                |
|------|----------------|-----------------|----------------|
| 1 Ga | 2.213272256000 | 14.638443450000 | 1.561151997000 |
| 2 Co | 3.583941411000 | 14.609454020000 | 3.759065918000 |
| 3 Co | 5.006811178000 | 14.508115620000 | 6.147355072000 |
| 4 C  | 4.268439541000 | 16.148831720000 | 6.468703117000 |
| 5 O  | 3.854540287000 | 17.193956690000 | 6.759063342000 |
| 6 C  | 6.463359212000 | 14.478879310000 | 5.044152664000 |
| 7 O  | 7.449917988000 | 14.463175110000 | 4.432816968000 |
| 8 C  | 5.888419865000 | 14.334567320000 | 7.707645165000 |
| 9 O  | 6.452415961000 | 14.223800250000 | 8.713039410000 |
| 10 C | 3.978602877000 | 13.012551050000 | 6.317483014000 |
| 11 O | 3.377674149000 | 12.040821200000 | 6.530556839000 |
| 12 C | 4.405923114000 | 16.170940260000 | 3.266395870000 |
| 13 O | 4.904490883000 | 17.154942260000 | 2.923467100000 |
| 14 C | 4.576408033000 | 13.369237130000 | 2.926732569000 |
| 15 O | 5.149843815000 | 12.509991040000 | 2.404032685000 |
| 16 C | 2.092527939000 | 15.184399900000 | 4.580039430000 |

```
END
```

```
XC
```

```
GGA Becke Perdew  
END
```

```
SCANFREQ -1000 0
```

```
AnalyticalFreq  
END
```

```
SAVE TAPE21 TAPE13
```

```
FULLSCF  
INTEGRATION 6.0
```

```
NOPRINT LOGFILE
```

```
eor
```

|      |                 |                 |                |
|------|-----------------|-----------------|----------------|
| 17 O | 1.114367569000  | 15.476750290000 | 5.123121916000 |
| 18 N | 0.824941375200  | 13.102926670000 | 1.656696463000 |
| 19 H | 0.646472676700  | 11.162807230000 | 0.788593413700 |
| 20 H | -2.393883390000 | 16.698341100000 | 2.605549586000 |
| 21 C | -0.481833898600 | 15.876432190000 | 2.022800949000 |
| 22 N | 0.769130174900  | 16.124547560000 | 1.620004855000 |
| 23 H | 0.527180793500  | 18.015300950000 | 0.664987965200 |
| 24 H | -2.037516849000 | 14.573102890000 | 2.603090898000 |
| 25 H | -1.008458835000 | 17.761391560000 | 2.955825298000 |
| 26 H | -2.310878311000 | 12.437409790000 | 2.672635533000 |
| 27 H | -1.591748620000 | 17.589769440000 | 1.293783797000 |
| 28 H | -0.886342334500 | 11.430482540000 | 3.032906080000 |
| 29 H | -1.487830222000 | 11.547567610000 | 1.373049394000 |
| 30 C | -1.424028205000 | 17.043111720000 | 2.233921913000 |
| 31 C | -0.433359204300 | 13.314245790000 | 2.056470427000 |
| 32 C | -1.332093598000 | 12.119294810000 | 2.300343172000 |
| 33 C | -1.006715464000 | 14.588000170000 | 2.255392267000 |
| 34 C | 1.198682922000  | 17.501490460000 | 1.368836552000 |
| 35 H | 1.244604285000  | 18.097934890000 | 2.294638763000 |
| 36 H | 2.200294017000  | 17.493162240000 | 0.923765454100 |
| 37 C | 1.309468160000  | 11.736376420000 | 1.452994869000 |
| 38 H | 2.299626040000  | 11.768276700000 | 0.984249711700 |
| 39 H | 1.403062424000  | 11.184563470000 | 2.402736505000 |
| 40 H | 2.866747710000  | 13.336581840000 | 4.091215914000 |
| 41 H | 3.068811952000  | 14.659170680000 | 0.195718578400 |

END

GUIBONDS

1 1 18 1.0  
2 1 22 1.0  
3 1 2 3  
4 2 16 2.0  
5 2 14 2.0  
6 2 12 1.5  
7 2 3 1.5  
8 3 8 2.0  
9 3 4 2.0  
10 3 10 2.0  
11 3 6 2.0  
12 4 5 2.0  
13 6 7 2.0  
14 8 9 2.0  
15 10 11 2.0  
16 12 13 2.0  
17 14 15 2.0  
18 16 17 2.0  
19 18 31 1.0  
20 19 37 1.0  
21 30 25 1.0  
22 33 21 1.5  
23 21 22 1.0  
24 21 30 1.0  
25 23 34 1.0  
26 31 33 1.5  
27 30 27 1.0  
28 30 20 1.0  
29 31 32 1.0  
30 32 28 1.0  
31 32 26 1.0  
32 32 29 1.0  
33 33 24 1.0  
34 35 34 1.0  
35 36 34 1.0  
36 34 22 1.0

#!/bin/sh

# =====  
# Co transition state gallyl (anti) to gallyl (syn)  
# =====

"\$ADFBIN/adf" <<eor

ATOMS

|      |                |                 |                |
|------|----------------|-----------------|----------------|
| 1 Ga | 2.109204759000 | 13.996950960000 | 1.659104465000 |
| 2 Co | 3.517460996000 | 14.318379250000 | 3.818027188000 |
| 3 Co | 5.056203514000 | 14.543461390000 | 6.124558936000 |

37 38 37 1.0  
38 39 37 1.0  
39 37 18 1.0  
40 40 2 1.0  
41 41 1 1.0  
END

BASIS

type TZP  
core Large  
createoutput None  
END

XC

GGA Becke Perdew  
END

SCANFREQ -1000 0

AnalyticalFreq  
END

SAVE TAPE21 TAPE13

SCF  
diis  
END

FULLSCF  
INTEGRATION 6

NoBeckeGrid  
NOPRINT LOGFILE

eor



|      |                 |                 |                 |
|------|-----------------|-----------------|-----------------|
| 4 C  | 3.625455909000  | 15.436171970000 | 6.833872946000  |
| 5 O  | 2.775191549000  | 16.016279320000 | 7.369557951000  |
| 6 C  | 6.165074053000  | 15.533260240000 | 5.061301025000  |
| 7 O  | 6.927731525000  | 16.180275280000 | 4.471905845000  |
| 8 C  | 6.087541697000  | 14.540890530000 | 7.600201569000  |
| 9 O  | 6.748719205000  | 14.540243310000 | 8.550898227000  |
| 10 C | 4.973971002000  | 12.733551530000 | 5.929470738000  |
| 11 O | 4.992304650000  | 11.572083100000 | 5.912821370000  |
| 12 C | 3.356511492000  | 16.141009050000 | 3.732563752000  |
| 13 O | 3.246536929000  | 17.288789220000 | 3.659351401000  |
| 14 C | 4.919771263000  | 13.999644110000 | 2.742320681000  |
| 15 O | 5.797572694000  | 13.711580120000 | 2.046766309000  |
| 16 C | 2.055297207000  | 13.872040880000 | 4.755454176000  |
| 17 O | 1.137590357000  | 13.500287340000 | 5.354156604000  |
| 18 N | 0.162411725500  | 13.476137050000 | 2.143117338000  |
| 19 H | -1.039057521000 | 11.732514020000 | 1.899962140000  |
| 20 H | -0.760740549400 | 18.257102310000 | 1.473049699000  |
| 21 C | 0.413762425600  | 16.445707770000 | 1.367636572000  |
| 22 N | 1.548027658000  | 15.866917810000 | 0.959352911300  |
| 23 H | 2.048521538000  | 17.045260290000 | -0.744740731300 |
| 24 H | -1.452485635000 | 16.408287570000 | 2.358109375000  |
| 25 H | 0.998633038100  | 18.532558230000 | 1.407979641000  |
| 26 H | -2.729572021000 | 14.857177130000 | 3.160072420000  |
| 27 H | 0.124110692900  | 18.054639750000 | -0.054592669490 |
| 28 H | -1.946760744000 | 13.445908270000 | 3.916336346000  |
| 29 H | -2.631771631000 | 13.311222260000 | 2.289800405000  |
| 30 C | 0.177478734300  | 17.903623950000 | 1.034144571000  |
| 31 C | -0.766258325400 | 14.409787430000 | 2.375183964000  |
| 32 C | -2.092761341000 | 13.987489180000 | 2.970422718000  |
| 33 C | -0.610086354400 | 15.780190370000 | 2.075536554000  |
| 34 C | 2.512358107000  | 16.625471160000 | 0.160674333100  |
| 35 H | 2.963319305000  | 17.454294100000 | 0.729721479800  |
| 36 H | 3.319610427000  | 15.957395890000 | -0.161400685200 |
| 37 C | -0.127552795100 | 12.067846410000 | 2.417208710000  |
| 38 H | 0.703936073200  | 11.451563450000 | 2.055583359000  |
| 39 H | -0.252165510900 | 11.872322220000 | 3.494374793000  |
| 40 H | 3.580060954000  | 12.818931150000 | 3.799515344000  |
| 41 H | 2.737698852000  | 13.044555020000 | 0.521412547900  |

END

GUIBONDS

1 1 18 1.0  
2 1 22 1.0  
3 1 2 3  
4 2 16 2.0  
5 2 14 2.0  
6 2 12 1.5  
7 2 3 1.5  
8 3 8 2.0  
9 3 4 2.0  
10 3 10 2.0  
11 3 6 2.0  
12 4 5 2.0  
13 6 7 2.0  
14 8 9 2.0  
15 10 11 2.0  
16 12 13 2.0  
17 14 15 2.0  
18 16 17 2.0  
19 18 31 1.0  
20 19 37 1.0  
21 30 25 1.0  
22 33 21 1.5  
23 21 22 1.0  
24 21 30 1.0  
25 23 34 1.0  
26 31 33 1.5  
27 30 27 1.0  
28 30 20 1.0  
29 31 32 1.0  
30 32 28 1.0  
31 32 26 1.0  
32 32 29 1.0  
33 33 24 1.0  
34 35 34 1.0  
35 36 34 1.0  
36 34 22 1.0

37 38 37 1.0  
38 39 37 1.0  
39 37 18 1.0  
40 40 2 1.0  
41 41 1 1.0  
END

BASIS

type TZP  
core Large  
createoutput None  
END

XC

GGA Becke Perdew  
END

SCANFREQ -1000 0

AnalyticalFreq  
END

SAVE TAPE21 TAPE13

SCF  
diis  
END

FULLSCF  
INTEGRATION 6

NoBeckeGrid  
NOPRINT LOGFILE

eor

```
#!/bin/sh

# =====
# Co gallyl (syn)
# =====

"$ADFBIN/adf" <<eor
ATOMS
1 Ga      2.170339723000      14.947901880000      1.585582609000
2 Co      3.519987705000      14.737668100000      3.801712664000
3 Co      5.055842462000      14.498660500000      6.108017490000
4 C       3.718829086000      13.407061130000      6.713292415000
5 O       2.923886363000      12.707238350000      7.187623805000
6 C       4.758901491000      16.295514140000      6.248584960000
7 O       4.620434483000      17.433619870000      6.430782714000
8 C       6.152207950000      14.333771800000      7.526399702000
9 O       6.854887159000      14.226819770000      8.440578355000
10 C      6.226792653000      13.862407430000      4.863185955000
11 O      7.054443909000      13.441154150000      4.165652455000
12 C      2.120946030000      15.381841610000      4.795015116000
13 O      1.232138650000      15.796388490000      5.405237626000
14 C      4.321631770000      16.238418570000      3.228022288000
15 O      4.883434237000      17.155143540000      2.800664343000
16 C      3.160736914000      12.982233950000      3.751538341000
17 O      3.004632064000      11.837676540000      3.675456381000
18 N      1.238756054000      13.156212010000      1.122115551000
19 H      1.429276629000      11.727280020000      -0.447175298600
20 H      -2.682713187000      15.215141070000      3.251896856000
21 C      -0.702212671400      15.183578140000      2.387580291000
22 N      0.375929081000      15.888268170000      2.027930566000
23 H      -0.483072823600      17.792494750000      1.603288094000
24 H      -1.752355028000      13.365333820000      2.626035757000
25 H      -1.618191095000      16.525203600000      3.822579886000
26 H      -1.456896233000      11.328550120000      1.957313596000
27 H      -2.327504653000      16.604501900000      2.202764330000
28 H      0.213967419700      10.713063280000      1.878790655000
29 H      -0.623085276000      11.190873780000      0.394433464400
30 C      -1.900503835000      15.918505530000      2.949852596000
31 C      0.031906820420      12.857007870000      1.614407965000
32 C      -0.490412129400      11.444737040000      1.457022629000
33 C      -0.818736501100      13.783168790000      2.254935421000
34 C      0.368967682000      17.347951200000      2.139189623000
35 H      0.326250063100      17.684526460000      3.187774794000
36 H      1.285986523000      17.748852240000      1.692036997000
37 C      2.005219400000      12.144627120000      0.392588694400
38 H      2.908296705000      12.606956370000      -0.022848776270
39 H      2.318380189000      11.312439970000      1.042804319000
40 H      4.627257834000      14.212638390000      2.936772016000
41 H      2.947398175000      15.584308090000      0.325844736500
END

GUIBONDS
1 1 18 1.0
2 1 22 1.0
3 1 2 3
4 2 16 2.0
5 2 14 2.0
6 2 12 1.5
7 2 3 1.5
8 3 8 2.0
9 3 4 2.0
10 3 10 2.0
11 3 6 2.0
12 4 5 2.0
13 6 7 2.0
14 8 9 2.0
15 10 11 2.0
16 12 13 2.0
17 14 15 2.0
18 16 17 2.0
19 18 31 1.0
20 19 37 1.0
21 30 25 1.0
22 33 21 1.5
23 21 22 1.0
24 21 30 1.0
25 23 34 1.0
26 31 33 1.5
27 30 27 1.0
28 30 20 1.0
29 31 32 1.0
30 32 28 1.0
31 32 26 1.0
32 32 29 1.0
33 33 24 1.0
34 35 34 1.0
35 36 34 1.0
36 34 22 1.0
37 38 37 1.0
38 39 37 1.0
39 37 18 1.0
40 40 2 1.0
41 41 1 1.0
END

BASIS
type TZP
```

```
core Large  
createoutput None  
END
```

```
XC  
GGA Becke Perdew  
END
```

```
SCANFREQ -1000 0
```

```
AnalyticalFreq  
END
```

```
#!/bin/sh
```

```
# =====  
# Co transition state H2 loss  
# =====
```

```
"$ADFBIN/adf" <<eor
```

```
ATOMS
```

|      |                 |                 |                 |
|------|-----------------|-----------------|-----------------|
| 1 Ga | 1.688673902000  | 14.532372470000 | 2.326387815000  |
| 2 Co | 3.422045229000  | 14.570524730000 | 4.058615711000  |
| 3 Co | 5.334361600000  | 14.617991570000 | 6.066891991000  |
| 4 C  | 4.496336787000  | 13.111086780000 | 6.686439597000  |
| 5 O  | 4.027669336000  | 12.156966710000 | 7.148747663000  |
| 6 C  | 4.567041016000  | 16.211341220000 | 6.545778476000  |
| 7 O  | 4.143284091000  | 17.223767140000 | 6.918805162000  |
| 8 C  | 6.679623387000  | 14.641520720000 | 7.260994734000  |
| 9 O  | 7.548265277000  | 14.656462000000 | 8.026233831000  |
| 10 C | 6.393845374000  | 14.526427270000 | 4.581380994000  |
| 11 O | 7.149686436000  | 14.469291170000 | 3.703378572000  |
| 12 C | 2.109898261000  | 14.658221410000 | 5.325359139000  |
| 13 O | 1.217610457000  | 14.712172370000 | 6.064335247000  |
| 14 C | 4.025593286000  | 16.206168110000 | 3.560039406000  |
| 15 O | 4.412576587000  | 17.244121320000 | 3.208927871000  |
| 16 C | 3.948212269000  | 12.870188890000 | 3.711893127000  |
| 17 O | 4.285988251000  | 11.787814820000 | 3.457344677000  |
| 18 N | 0.447053339900  | 13.004342390000 | 1.760471476000  |
| 19 H | 1.138323836000  | 11.038873090000 | 1.309122513000  |
| 20 H | -2.136609035000 | 16.626741110000 | -0.355724901900 |
| 21 C | -0.550728661000 | 15.803022360000 | 0.857574753500  |
| 22 N | 0.519413706300  | 16.059082470000 | 1.620174955000  |
| 23 H | 1.300703409000  | 17.940629890000 | 0.992403580600  |
| 24 H | -1.909196868000 | 14.506245700000 | -0.097858821870 |
| 25 H | -1.743259544000 | 17.597949450000 | 1.080635021000  |
| 26 H | -2.238614022000 | 12.384401300000 | -0.158891554100 |
| 27 H | -0.659240704300 | 17.621657210000 | -0.317057313900 |
| 28 H | -1.885443240000 | 11.529943790000 | 1.359748160000  |
| 29 H | -0.808902334400 | 11.329322980000 | -0.029492829380 |
| 30 C | -1.317220358000 | 16.974291480000 | 0.280770907300  |
| 31 C | -0.611519133400 | 13.239734860000 | 0.975410813800  |
| 32 C | -1.433885827000 | 12.058094560000 | 0.506893459800  |
| 33 C | -1.034832796000 | 14.515258970000 | 0.549290831500  |
| 34 C | 0.918834966500  | 17.441837130000 | 1.897177662000  |
| 35 H | 0.082827940820  | 18.035000840000 | 2.294781588000  |
| 36 H | 1.717264752000  | 17.445416320000 | 2.645303603000  |
| 37 C | 0.781609434700  | 11.635459500000 | 2.163566931000  |
| 38 H | 1.580098094000  | 11.662794440000 | 2.911152745000  |
| 39 H | -0.080671346470 | 11.120836060000 | 2.611270469000  |
| 40 H | 3.667734594000  | 14.485881160000 | 2.332557352000  |
| 41 H | 3.162697999000  | 14.446633410000 | 1.217527322000  |

```
GUIBONDS
```

```
1 1 18 1.0  
2 1 22 1.0  
3 1 2 3  
4 2 16 2.0  
5 2 14 2.0  
6 2 12 1.5  
7 2 3 1.5  
8 3 8 2.0  
9 3 4 2.0  
10 3 10 2.0
```

```
SAVE TAPE21 TAPE13
```

```
SCF  
diis  
END
```

```
FULLSCF  
INTEGRATION 6
```

```
NoBeckeGrid  
NOPRINT LOGFILE
```

```
eor
```

```
11 3 6 2.0  
12 4 5 2.0  
13 6 7 2.0  
14 8 9 2.0  
15 10 11 2.0  
16 12 13 2.0  
17 14 15 2.0  
18 16 17 2.0  
19 18 31 1.0  
20 19 37 1.0  
21 30 25 1.0
```

```
22 33 21 1.5
23 21 22 1.0
24 21 30 1.0
25 23 34 1.0
26 31 33 1.5
27 30 27 1.0
28 30 20 1.0
29 31 32 1.0
30 32 28 1.0
31 32 26 1.0
32 32 29 1.0
33 33 24 1.0
34 35 34 1.0
35 36 34 1.0
36 34 22 1.0
37 38 37 1.0
38 39 37 1.0
39 37 18 1.0
40 40 2 1.0
41 41 1 1.0
END
```

```
BASIS
type TZP
core Large
createoutput None
```

```
#!/bin/sh
```

```
# =====
# Co2 (CO) 7 (MeNacNacGa)
# =====
```

```
"$ADFBIN/adf" <<eor
```

```
ATOMS
```

|      |                 |                 |                 |
|------|-----------------|-----------------|-----------------|
| 1 Ga | 1.695301557000  | 14.504386480000 | 2.545211471000  |
| 2 Co | 3.408294431000  | 14.535545130000 | 4.122955032000  |
| 3 Co | 5.356890509000  | 14.700446180000 | 5.981433548000  |
| 4 C  | 4.693517110000  | 16.391857000000 | 6.199289532000  |
| 5 O  | 4.332175514000  | 17.475873100000 | 6.394937621000  |
| 6 C  | 6.452777513000  | 14.366061020000 | 4.551529656000  |
| 7 O  | 7.212546172000  | 14.163208340000 | 3.700909408000  |
| 8 C  | 6.651965556000  | 14.817672690000 | 7.223270015000  |
| 9 O  | 7.485262945000  | 14.894222710000 | 8.023027870000  |
| 10 C | 4.454986436000  | 13.295817850000 | 6.736679638000  |
| 11 O | 3.943148473000  | 12.408096070000 | 7.277073531000  |
| 12 C | 4.163948960000  | 15.922104130000 | 3.227559760000  |
| 13 O | 4.631200677000  | 16.810072440000 | 2.637823314000  |
| 14 C | 3.914730643000  | 12.832678250000 | 3.750899712000  |
| 15 O | 4.229299964000  | 11.739702640000 | 3.499975500000  |
| 16 C | 2.172049450000  | 14.856606830000 | 5.412800659000  |
| 17 O | 1.360961523000  | 15.060043210000 | 6.222474268000  |
| 18 N | 0.869576466300  | 13.212257190000 | 1.170334215000  |
| 19 H | 1.856273328000  | 11.679543940000 | 0.059996708790  |
| 20 H | -2.200359193000 | 16.914430670000 | 0.120015440200  |
| 21 C | -0.570323828900 | 15.941611680000 | 1.153734866000  |
| 22 N | 0.390907663000  | 16.040745450000 | 2.081209505000  |
| 23 H | 0.793976351100  | 18.134086370000 | 2.160361690000  |
| 24 H | -1.633893087000 | 14.877718080000 | -0.325678936300 |
| 25 H | -2.005416141000 | 17.422961470000 | 1.814954463000  |
| 26 H | -1.529495690000 | 12.902467260000 | -1.170440158000 |
| 27 H | -0.876830065000 | 18.009619260000 | 0.587508195300  |
| 28 H | -1.024684643000 | 11.600177950000 | -0.067574713340 |
| 29 H | 0.097526014770  | 12.192915680000 | -1.298288464000 |
| 30 C | -1.465709952000 | 17.135070070000 | 0.900760700400  |
| 31 C | -0.165958657400 | 13.540304450000 | 0.379003510300  |
| 32 C | -0.688057323300 | 12.505035630000 | -0.594488324000 |
| 33 C | -0.812858487700 | 14.788152490000 | 0.382661914900  |
| 34 C | 0.556220326300  | 17.292975970000 | 2.828710870000  |
| 35 H | -0.349745206500 | 17.546312250000 | 3.399230639000  |
| 36 H | 1.383302721000  | 17.179744570000 | 3.538222766000  |
| 37 C | 1.458724015000  | 11.870356910000 | 1.068137474000  |
| 38 H | 2.285570414000  | 11.780798530000 | 1.778469699000  |
| 39 H | 0.723003153400  | 11.086901110000 | 1.304029219000  |

```
END
```

```
END
```

```
XC
GGA Becke Perdew
END
```

```
SCANFREQ -1000 0
```

```
AnalyticalFreq
END
```

```
SAVE TAPE21 TAPE13
```

```
SCF
diis
END
```

```
FULLSCF
INTEGRATION 6
```

```
NoBeckeGrid
NOPRINT LOGFILE
```

```
eor
```

```
GUIBONDS
1 1 18 1.0
2 1 22 1.0
3 1 2 3
4 2 16 2.0
5 2 14 2.0
6 2 12 1.5
7 2 3 1.5
8 3 8 2.0
9 3 4 2.0
10 3 10 2.0
11 3 6 2.0
12 4 5 2.0
13 6 7 2.0
14 8 9 2.0
15 10 11 2.0
16 12 13 2.0
17 14 15 2.0
18 16 17 2.0
19 18 31 1.0
20 19 37 1.0
21 30 25 1.0
22 33 21 1.5
23 21 22 1.0
24 21 30 1.0
25 23 34 1.0
26 31 33 1.5
27 30 27 1.0
28 30 20 1.0
29 31 32 1.0
30 32 28 1.0
31 32 26 1.0
32 32 29 1.0
33 33 24 1.0
34 35 34 1.0
35 36 34 1.0

36 34 22 1.0
37 38 37 1.0
38 39 37 1.0
39 37 18 1.0
END

BASIS
type TZP
core Large
createoutput None
END

XC
GGA Becke Perdew
END

SCANFREQ -1000 0

AnalyticalFreq
END

SAVE TAPE21 TAPE13

SCF
diis
END

FULLSCF
INTEGRATION 6

NoBeckeGrid
NOPRINT LOGFILE

eor
```

## 2c. ETS-NOCV calculation on (OC)<sub>5</sub>W(Ga{(NMeCMe)<sub>2</sub>CH})

```
#!/bin/sh
```

```
# =====
# W(CO) 5 (MeNacNacGa)
# =====
```

```
"$ADFBIN/adf" <<eor
```

```
ATOMS
1 W 6.555255167000 17.306178090000 15.830581080000 f=Metal b=Metal
2 Ga 4.584797417000 15.487383540000 15.824942020000 f=Ligand b=Ligand
3 N 3.023831362000 15.011966260000 14.506215440000 f=Ligand b=Ligand
4 H 3.057203333000 15.215093740000 12.379948150000 f=Ligand b=Ligand
5 H 2.421376289000 12.564967460000 18.973349180000 f=Ligand b=Ligand
6 C 2.937792892000 13.152582140000 16.950230310000 f=Ligand b=Ligand
7 C 2.623575996000 12.102156550000 17.996051800000 f=Ligand b=Ligand
8 H 1.748426287000 11.511694280000 17.706557620000 f=Ligand b=Ligand
9 H 3.472875905000 11.417063360000 18.135929240000 f=Ligand b=Ligand
10 O 5.845918008000 17.982866140000 18.939388080000 f=Metal b=Metal
11 H 1.290575899000 12.460176930000 15.826325040000 f=Ligand b=Ligand
12 H 0.382511168200 12.997237910000 13.947446510000 f=Ligand b=Ligand
13 H 0.438065150600 14.722162930000 13.513132380000 f=Ligand b=Ligand
14 H 1.490302730000 13.572469460000 12.679050600000 f=Ligand b=Ligand
15 N 3.981247219000 13.970635320000 17.143736270000 f=Ligand b=Ligand
16 C 2.120557982000 14.041409750000 14.700690180000 f=Ligand b=Ligand
17 C 2.092417733000 13.195983180000 15.825688440000 f=Ligand b=Ligand
18 C 1.046725621000 13.816961250000 13.655619330000 f=Ligand b=Ligand
19 C 8.063481727000 18.704102900000 15.836044670000 f=Metal b=Metal
20 O 8.915642305000 19.494656190000 15.839575020000 f=Metal b=Metal
21 C 6.963045306000 16.818759000000 13.830368530000 f=Metal b=Metal
22 O 7.188850211000 16.555038630000 12.722335200000 f=Metal b=Metal
23 C 7.884544902000 15.812339300000 16.466847050000 f=Metal b=Metal
24 O 8.622610060000 14.989682470000 16.823167660000 f=Metal b=Metal
25 C 5.172786979000 18.749627910000 15.191483900000 f=Metal b=Metal
```

|      |                |                 |                 |                   |
|------|----------------|-----------------|-----------------|-------------------|
| 26 O | 4.412192774000 | 19.550427490000 | 14.832775640000 | f=Metal b=Metal   |
| 27 H | 5.589743650000 | 14.571975380000 | 18.348292680000 | f=Ligand b=Ligand |
| 28 C | 6.094247006000 | 17.742179630000 | 17.830922720000 | f=Metal b=Metal   |
| 29 C | 2.947352920000 | 15.825996870000 | 13.289170280000 | f=Ligand b=Ligand |
| 30 H | 1.995260793000 | 16.374580930000 | 13.222039110000 | f=Ligand b=Ligand |
| 31 H | 3.759158763000 | 16.562135460000 | 13.299513970000 | f=Ligand b=Ligand |
| 32 C | 4.786838721000 | 13.826145140000 | 18.360228880000 | f=Ligand b=Ligand |
| 33 H | 4.188557836000 | 13.988851870000 | 19.269946300000 | f=Ligand b=Ligand |
| 34 H | 5.252041275000 | 12.830662550000 | 18.427954090000 | f=Ligand b=Ligand |

END

GUIBONDS

1 1 25 1.5  
2 1 19 1.5  
3 1 23 1.5  
4 1 21 1.5  
5 1 28 1.0  
6 1 2 3  
7 2 3 1.0  
8 2 15 1.0  
9 3 16 1.0  
10 4 29 1.0  
11 19 20 2.0  
12 21 22 2.0  
13 23 24 2.0  
14 25 26 2.0  
15 15 6 1.0  
16 27 32 1.0  
17 7 5 1.0  
18 7 8 1.0  
19 6 7 1.0  
20 7 9 1.0  
21 28 10 2.0  
22 16 17 1.5  
23 16 18 1.0  
24 17 11 1.0  
25 17 6 1.5  
26 18 14 1.0  
27 18 13 1.0  
28 18 12 1.0  
29 30 29 1.0  
30 31 29 1.0  
31 29 3 1.0  
32 33 32 1.0  
33 34 32 1.0  
34 32 15 1.0

END

SYMMETRY NOSYM

BASIS

type TZP  
core Large  
createoutput None

END

XC

GGA Becke Perdew

END

Fragments

Ligand Frag\_W(CO)5\_Me\_Ga\_d6.Ligand.t21  
Metal Frag\_W(CO)5\_Me\_Ga\_d6.Metal.t21

end

ETSNOCV

PRINT ETSLOWDIN  
SAVE TAPE21 TAPE13

SCF

diis  
END

FULLSCF

INTEGRATION 6

NoBeckeGrid  
NOPRINT LOGFILE

eor

#### 4. References for supporting information

- S1. A. Tekkaya, C. Ceyhan and S. Özkaz, *Inorg. Chem.*, 1994, **33**, 2439.
- S2. S. Singh, H-J. Ahn, A. Stasch, V. Jancik, H.W. Roesky, A. Pal, M. Biadene, R. Herbst-Irmer, M. Noltemeyer, and H-G. Schmidt, *Inorg. Chem.*, 2006,  
5 **45**, 1853.
- S3. N.J. Hardman, R.J. Wright, A.D. Phillips and P.P. Power, *J. Am. Chem. Soc.*, 2003, **125**, 2667.
- S4. (a) G. te Velde, F. M. Bickelhaupt, S. J. A. van Gisbergen, C. Fonseca Guerra, E. J. Baerends, J. G. Snijders and T. Ziegler, *J. Comput. Chem.*, 2001,  
**22**, 931. (b) C. Fonseca Guerra, J. G. Snijders, G. te Velde and E. J. Baerends, *Theor. Chem. Acc.*, 1998, **99**, 391. (c) E.J. Baerends, T. Ziegler, J.  
Autschbach, D. Bashford, A. Bérces, F.M. Bickelhaupt, C. Bo, P.M. Boerrigter, L. Cavallo, D.P. Chong, L. Deng, R.M. Dickson, D.E. Ellis, M. van  
10 Faassen, L. Fan, T.H. Fischer, C. Fonseca Guerra, A. Ghysels, A. Giammona, S.J.A. van Gisbergen, A.W. Götz, J.A. Groeneveld, O.V. Gritsenko, M.  
Grüning, S. Gusarov, F.E. Harris, P. van den Hoek, C.R. Jacob, H. Jacobsen, L. Jensen, J.W. Kaminski, G. van Kessel, F. Kootstra, A. Kovalenko,  
M.V. Krykunov, E. van Lenthe, D.A. McCormack, A. Michalak, M. Mitoraj, J. Neugebauer, V.P. Nicu, L. Noodleman, V.P. Osinga, S. Patchkovskii,  
P.H.T. Philipsen, D. Post, C.C. Pye, W. Ravenek, J.I. Rodríguez, P. Ros, P.R.T. Schipper, G. Schreckenbach, J.S. Seldenthuis, M. Seth, J.G. Snijders,  
15 M. Solà, M. Swart, D. Swerhone, G. te Velde, P. Vernooijs, L. Versluis, L. Visscher, O. Visser, F. Wang, T.A. Wesolowski, E.M. van Wezenbeek, G.  
Wiesenekker, S.K. Wolff, T.K. Woo and A.L. Yakovlev, ADF2012, SCM, Theoretical Chemistry, Vrije Universiteit, Amsterdam. The Netherlands.  
<http://www.scm.com>.
- S5. A. D. Becke, *Phys. Rev. A*, 1988, **38**, 3098.
- S6. J. P. Perdew, *Phys. Rev. B*, 1986, **33**, 8822.
- S7. J. G. Snijders, P. Vernooijs and E. J. Baerends, *At. Data Nucl. Data Tables*, 1982, **26**, 483.
